# LSE

## CBE—LIFE SCIENCES EDUCATION

VOLUME 15 • FALL 2016 • [www.lifescied.org](http://www.lifescied.org)

### SPECIAL ISSUE

## Broadening Participation in the Life Sciences

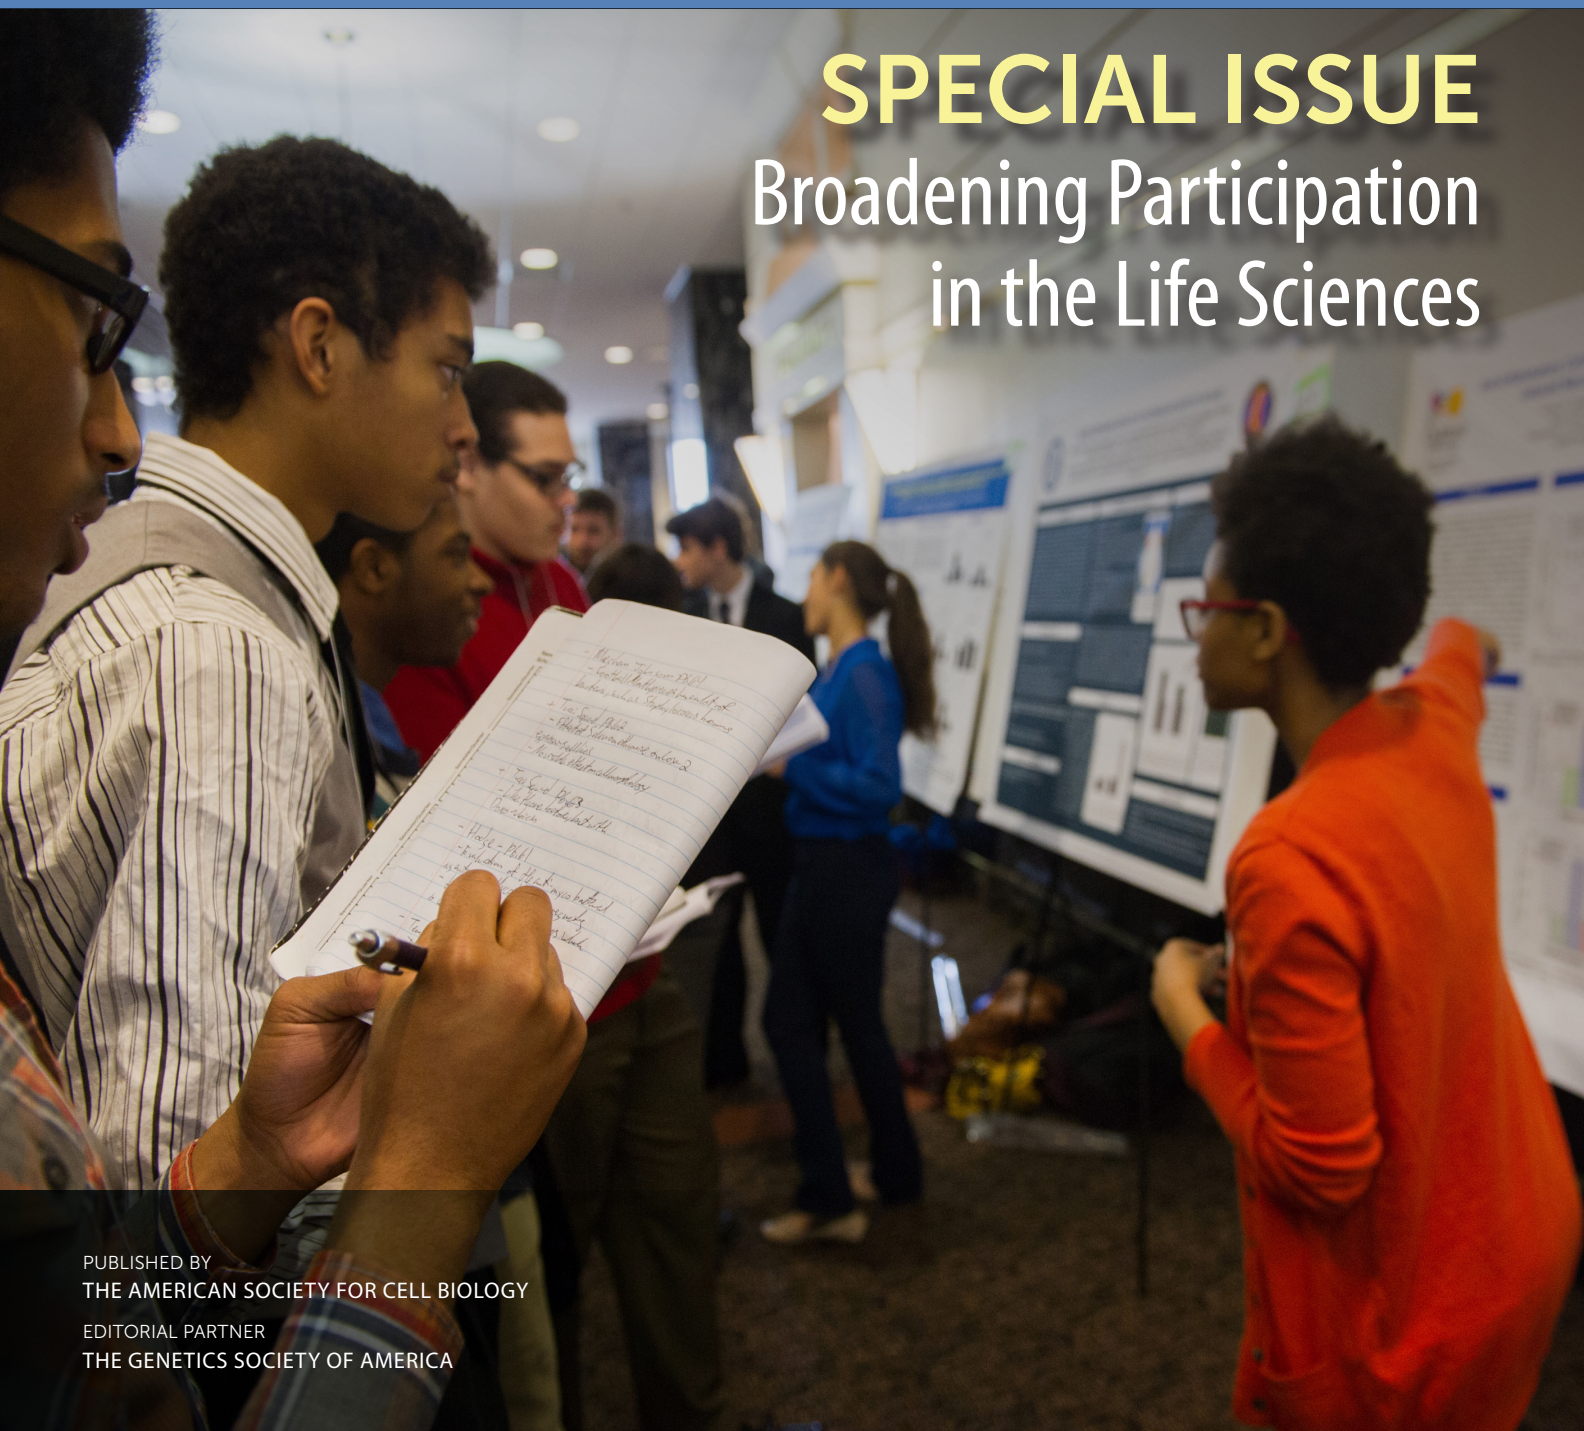

PUBLISHED BY  
THE AMERICAN SOCIETY FOR CELL BIOLOGY  
EDITORIAL PARTNER  
THE GENETICS SOCIETY OF AMERICA
